# Supplementary material for: Pretreatment of Cardiac Stem Cells With Exosomes Derived From Mesenchymal Stem Cells Enhances Myocardial Repair
Source: PubMed Central journal article supplement — J Am Heart Assoc. 2016 Jan 25;5(1):e002856. doi: 10.1161/JAHA.115.002856 (PMC4859399; doi:10.1161/jaha.115.002856), 2016-01-25
Supplement: JAH3-5-e002856-s005.pdf [file JAH3-5-e002856-s005.pdf]

## **SUPPLEMENTAL MATERIAL**

### **Data S1: The list of identified target genes**

The possible target genes of significantly changed miRNAs were predicted by TargetScan and Miranda software. The gene symbol, align score, energy, miRNA start, miRNA end, gene start, gene end, miRNA align, alignment and gene align are shown in the excel file.

### **Data S2: The biological functions indicated by the target genes of differentially expressed miRNAs**

The GO categories were analyzed. GO id, GO name, enrichment, p-value, FDR, gene id and gene name were shown in the file.

### **Data S3: The pathway analysis on the miRNAs target genes**

The pathways were also analyzed. Path id, path name, path gene count, enrichment, p-value and FDR were shown in the file.

### **Data S4: MicroRNA-gene relationship**

MicroRNA-gene relationship was described in the file. The enrichment degree of microRNAs and genes were shown in the file, respectively.
